# Supplementary material for: Pharmacokinetic Comparisons of Different Combinations of Yigan Jiangzhi Formula in Rats: Simultaneous Determination of Fourteen Components by UPLC-MS/MS
Source: Hindawi journal article supplement (doi:10.1155/2020/9353975), 2020-03-21
Supplement: f1 [file 9353975.f1.pdf]

# Yigan Jiangzhi formula

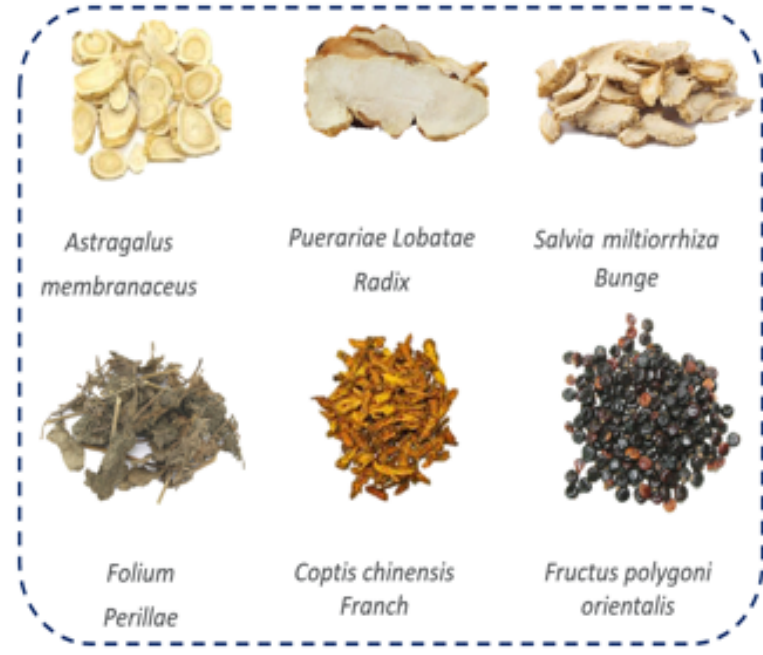

# UPLC-MS/MS

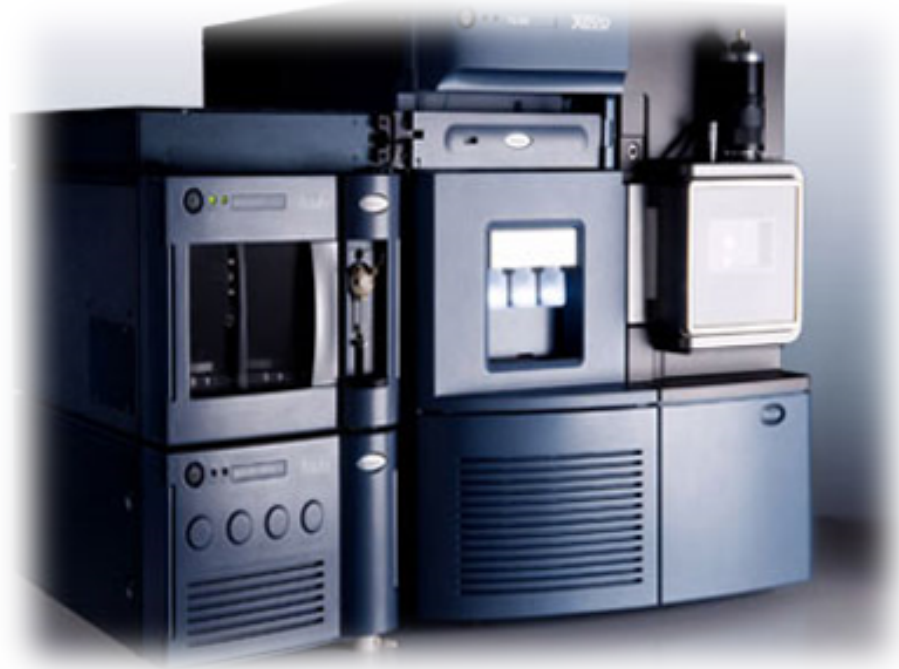

Rat plasma

14 components

Oral administration

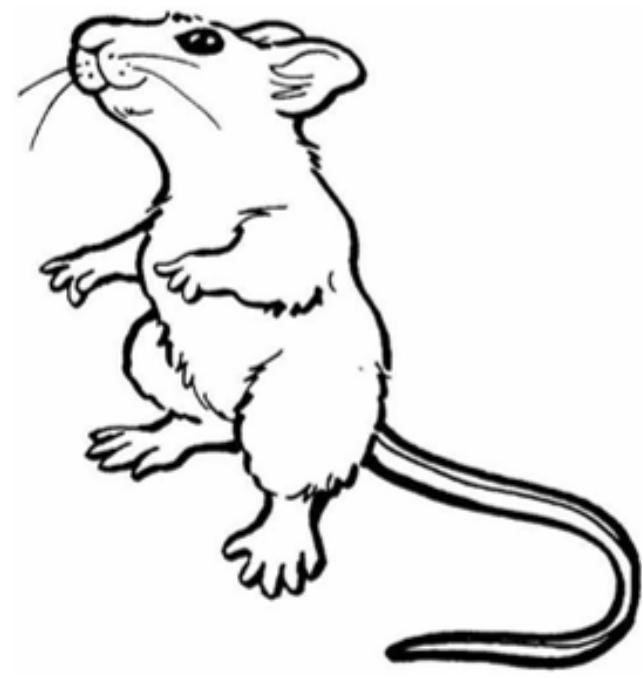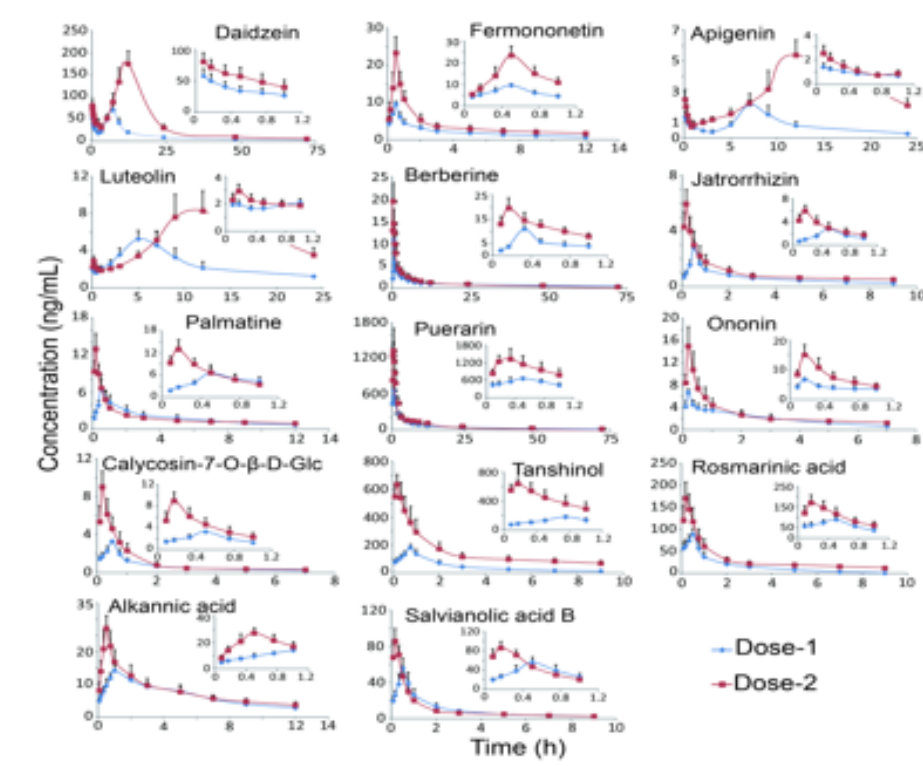

Comparative pharmacokinetic study

# Dosage increase

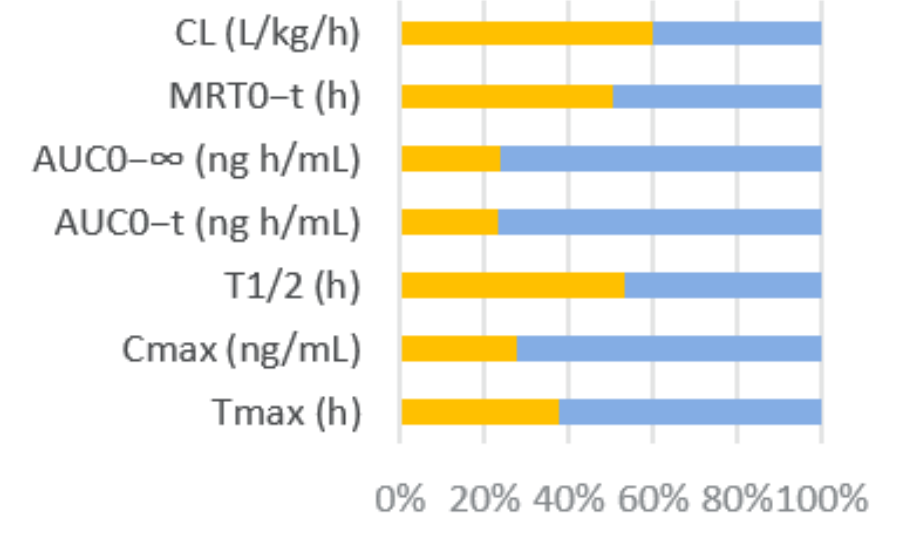

Bioavailability

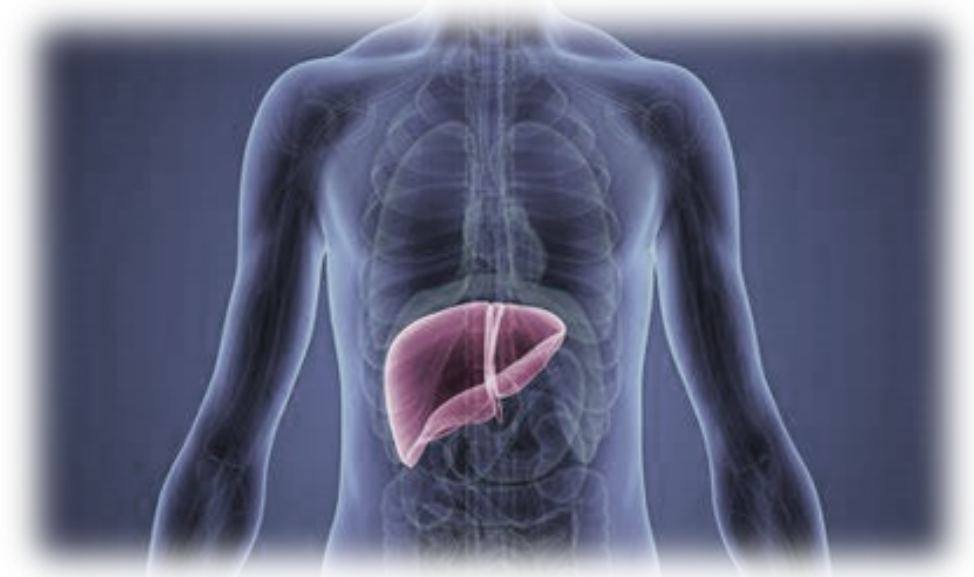

Treatment of liver disease
